# Supplementary material for: The Aminoacyl-tRNA Synthetase and tRNA Expression Levels Are Deregulated in Cancer and Correlate Independently with Patient Survival
Source: MDPI journal article supplement (doi:10.3390/cimb44070207), 2022-07-02
Supplement: s1 [file s1]

**Table S1.** Aminoacyl-tRNA synthetases

| Symbol | Name                                       |
|--------|--------------------------------------------|
| AARS   | Alanyl-tRNA synthetase                     |
| CARS   | Cysteinyl-tRNA synthetase                  |
| DARS   | Aspartyl-tRNA synthetase                   |
| EPRS   | Glutamyl-prolyl-tRNA synthetase            |
| FARSA  | Phenylalanyl-tRNA synthetase subunit alpha |
| FARSB  | Phenylalanyl-tRNA synthetase subunit beta  |
| GARS   | Glycyl-tRNA synthetase                     |
| HARS   | Histidyl-tRNA synthetase                   |
| IARS   | Isoleucyl-tRNA synthetase                  |
| KARS   | Lysyl-tRNA synthetase                      |
| LARS   | Leucyl-tRNA synthetase                     |
| MARS   | Methionyl-tRNA synthetase                  |
| NARS   | Asparaginyl-tRNA synthetase                |
| QARS   | Glutaminyl-tRNA synthetase                 |
| RARS   | Arginyl-tRNA synthetase                    |
| SARS   | Seryl-tRNA synthetase                      |
| TARS   | Threonyl-tRNA synthetase                   |
| VARs   | Valyl-tRNA synthetase                      |
| WARS   | Tryptophanyl-tRNA synthetase               |
| YARS   | Tyrosyl-tRNA synthetase                    |

**Table S2.** TCGA cancer types and sample numbers per TCGA dataset. N: Normal, T: Tumour.

| Symbol | Name                                     | DNA<br>(N) | DNA<br>(T) | mRNA<br>(N) | mRNA<br>(T) | tRNA<br>(N) | tRNA<br>(T) |
|--------|------------------------------------------|------------|------------|-------------|-------------|-------------|-------------|
| BRCA   | Breast Invasive Carcinoma                | 139        | 1101       | 113         | 1092        | 104         | 1077        |
| HNSC   | Head And Neck Squamous<br>Cell Carcinoma | 74         | 528        | 44          | 518         | 44          | 523         |
| KIRC   | Kidney Renal Clear Cell<br>Carcinoma     | 407        | 538        | 129         | 530         | 71          | 516         |
| KIRP   | Kidney Renal Papillary Cell<br>Carcinoma | 60         | 292        | 129         | 288         | 34          | 290         |
| LIHC   | Liver Hepatocellular<br>Carcinoma        | 59         | 377        | 50          | 369         | 50          | 372         |
| LUAD   | Lung Adenocarcinoma                      | 120        | 520        | 109         | 513         | 45          | 514         |
| LUSC   | Lung Squamous Cell<br>Carcinoma          | 120        | 506        | 109         | 498         | 45          | 476         |
| PRAD   | Prostate Adenocarcinoma                  | 67         | 498        | 52          | 495         | 52          | 483         |
| STAD   | Stomach Adenocarcinoma                   | 102        | 478        | 36          | 414         | 37          | 409         |
| THCA   | Thyroid Carcinoma                        | 65         | 507        | 59          | 504         | 71          | 510         |
